# Supplementary material
Source: Springer Nature journal article supplement (https://www.springermedizin.de/resource/supplementary/12986_2009_191_MOESM6_ESM.pdf/25655558)

AC-1202

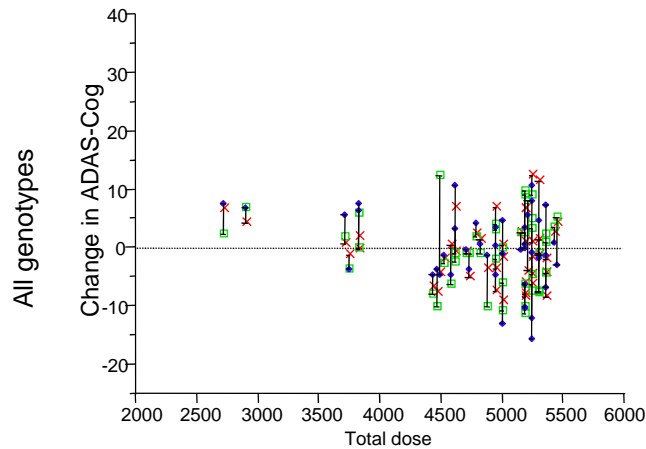

Placebo

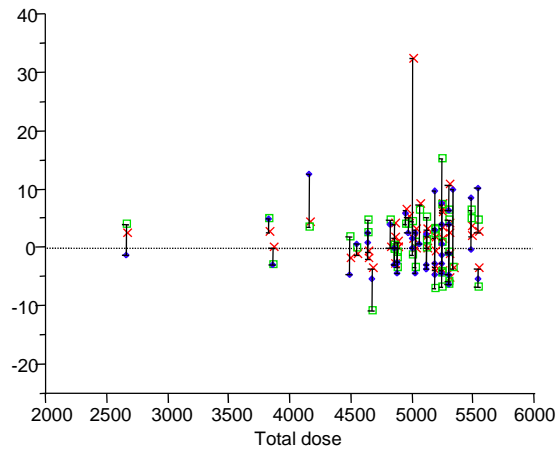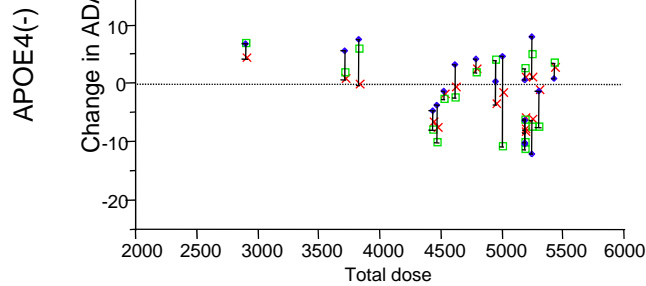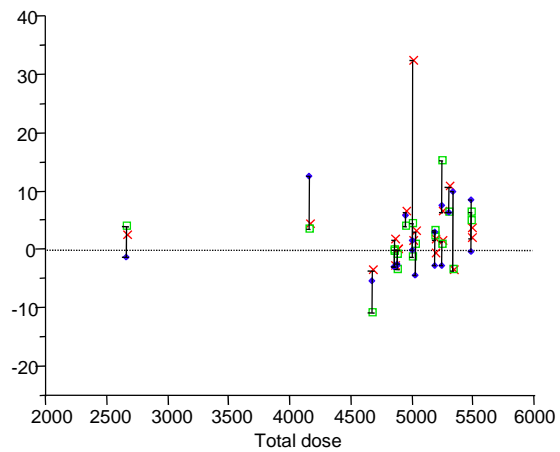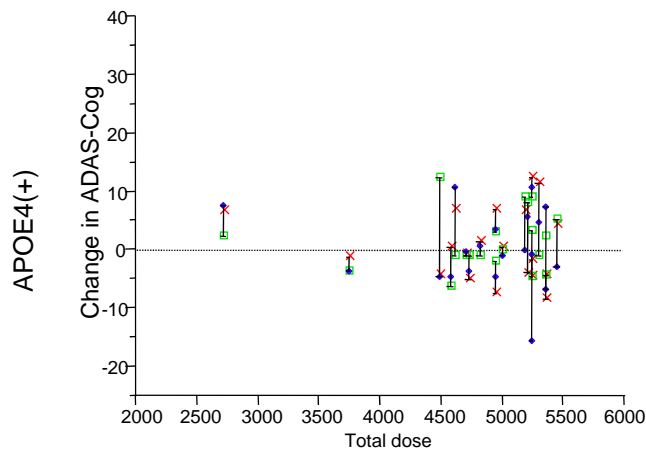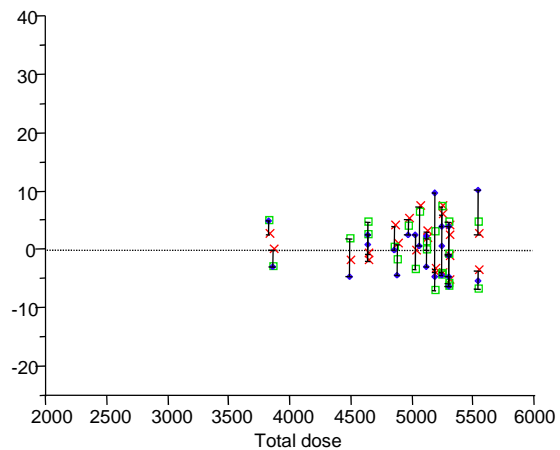

× Day 45    □ Day 90    ◇ Day 104

Supplement: MOESM6 [file 25655558]
